# Supplementary material
Source: PubMed Central journal article supplement (PMC4704217)
Supplement: AAC.02071-15_zac001164747so1.pdf [file AAC.02071-15_zac001164747so1.pdf]

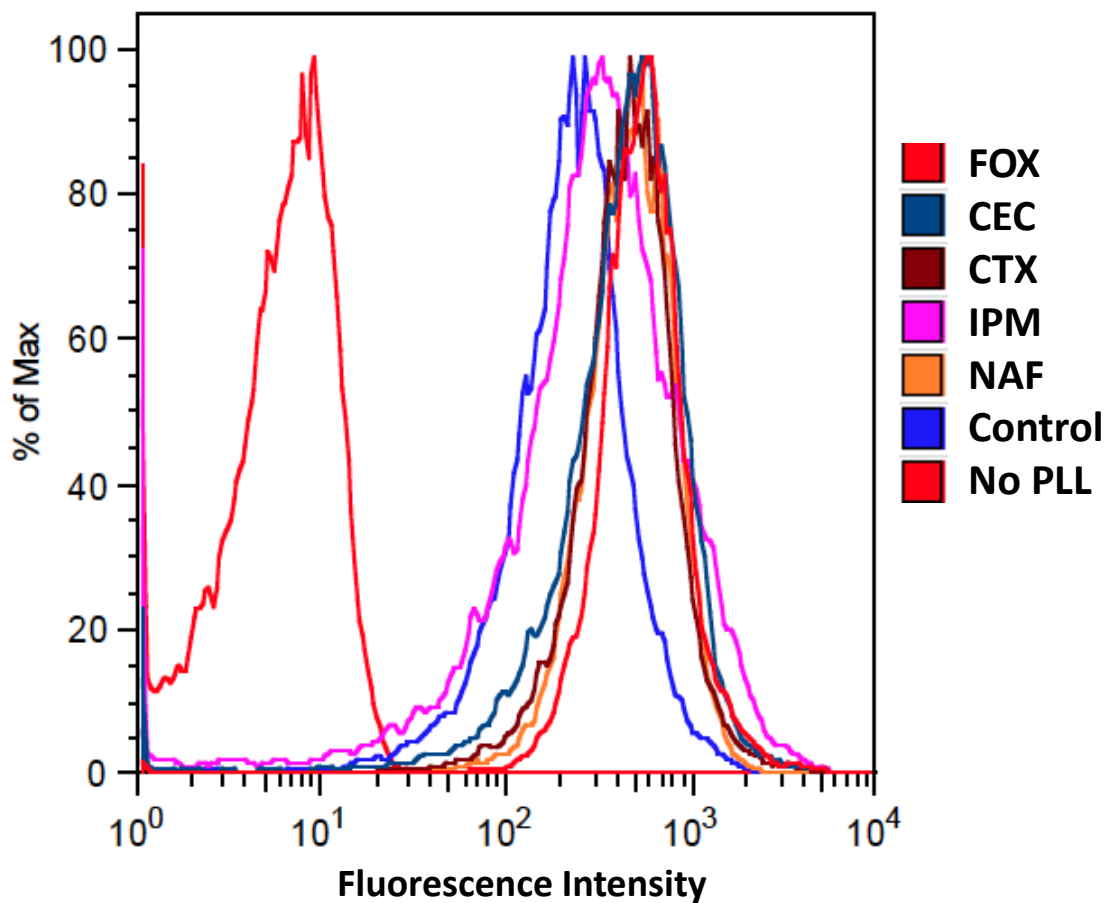

**Figure S1. FITC-labeled PLL binding assay using flow cytometry.** The degree of FITC-labeled PLL inversely reflects the relative surface positive charge. The increased affinity to PLL indicates a net decrease in relative positive surface charge when bacteria were grown in  $\beta$ -lactam.

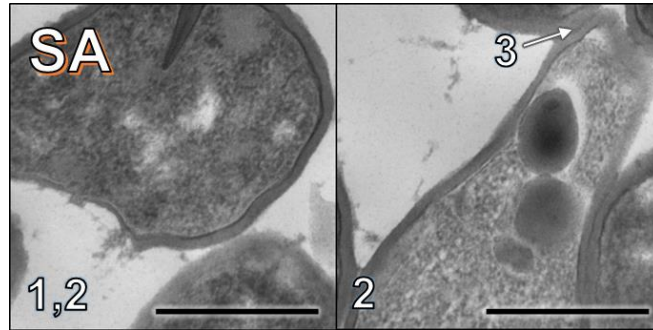

**Figure S2. Cell morphology observations following overnight  $\beta$ -lactam exposure at  $fC_{avg}$  concentration.** Each panel consists of two representative images of *S. aureus* D712 exposed to the following conditions: (SA) CRO. Notable Features: (1) abnormal septation/separation ; (2) atypical cell shape/morphology ; (3) membrane invagination. Scale bar, 500nm.

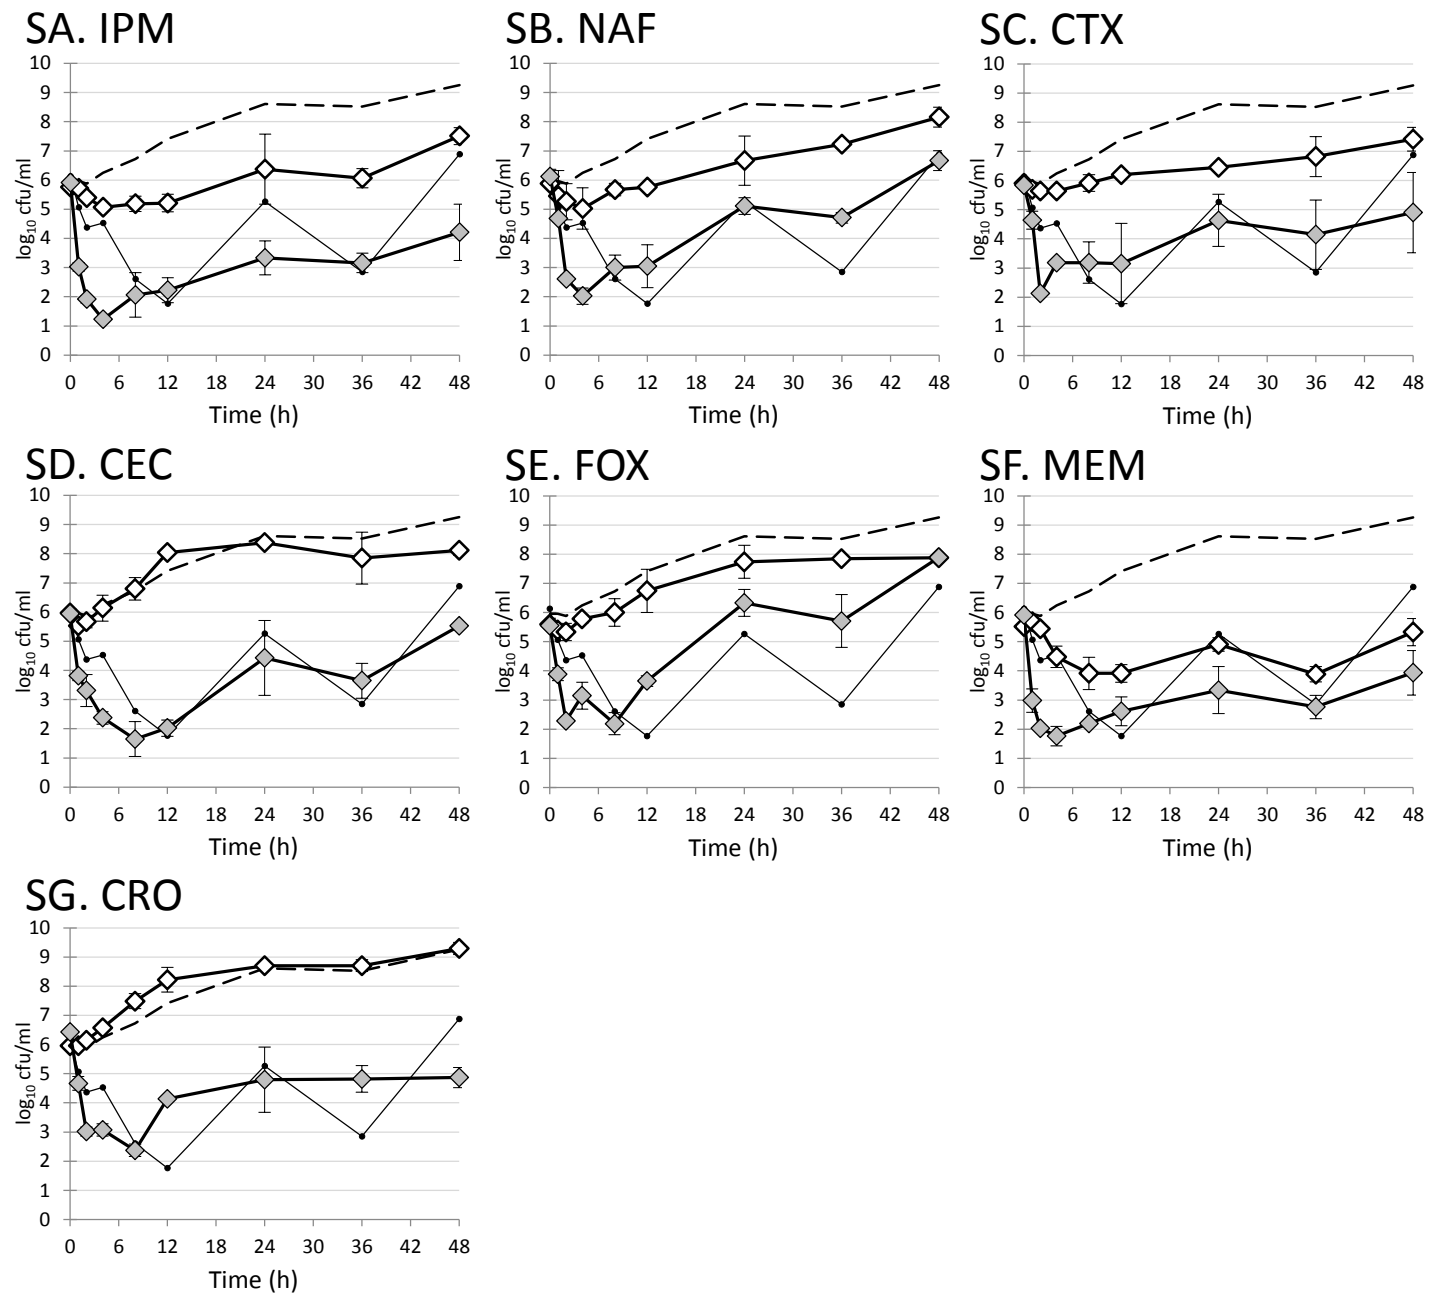

**Figure S3. Activity of daptomycin and/or  $\beta$ -lactam in a 48-hour *in vitro* pharmacokinetic/pharmacodynamic model.** Dotted line, growth control; small black circles, daptomycin; white symbols,  $\beta$ -lactam monotherapy; gray symbols, daptomycin+ $\beta$ -lactam.
